# Supplementary material
Source: HighWire-hosted journal article supplement (https://rmdopen.bmj.com/content/8/1/e001955)
Supplement: inline-supplementary-material-1 [file inline-supplementary-material-1.xlsx]

## Sheet: Appendix Table 1
ASDAS preferred model
					95% Confidence Interval
	Coefficient	Robust se	z	P>|z|	Lower	Upper
Component 1
ASDAS/10	-2.07852	0.606542	-3.43	0.001	-3.26732	-0.889721
(ASDAS/10)^2	1.6604	1.03592	1.6	0.109	-0.369977	3.69077
age/10	-0.0556485	0.0452316	-1.23	0.219	-0.144301	0.0330038
(age/10)^2	0.0039492	0.0046654	0.85	0.397	-0.0051948	0.0130932
Male	-0.0027685	0.0222063	-0.12	0.901	-0.0462921	0.040755
Constant	0.716508	0.124448	5.76	0	0.472595	0.960422
Component 2
ASDAS/10	0	(omitted)
(ASDAS/10)^2	0	(omitted)
age/10	0	(omitted)
(age/10)^2	0	(omitted)
Male	0	(omitted)
Constant	100	(constrained)
Component 3
ASDAS/10	-4.2225	3.8131	-1.11	0.268	-11.696	3.25104
(ASDAS/10)^2	8.73062	9.68416	0.9	0.367	-10.25	27.7112
age/10	-0.664447	0.396008	-1.68	0.093	-1.44061	0.111716
(age/10)^2	0.0651668	0.0394017	1.65	0.098	-0.0120591	0.142393
Male	0.930192	0.157632	5.9	0	0.621239	1.23915
Constant	2.90261	1.10168	2.63	0.008	0.74335	5.06187
Component 4
ASDAS/10	-1.49297	0.140319	-10.64	0	-1.76799	-1.21795
(ASDAS/10)^2	1.66935	0.257376	6.49	0	1.1649	2.1738
age/10	-0.0632085	0.0224412	-2.82	0.005	-0.107192	-0.0192246
(age/10)^2	0.004941	0.0023365	2.11	0.034	0.0003616	0.0095204
Male	0.0094041	0.0102381	0.92	0.358	-0.0106622	0.0294703
Constant	1.10923	0.0530365	20.91	0	1.00529	1.21318
Prob_C1
ASDAS/10	10.9629	0.846214	12.96	0	9.30434	12.6214
Constant	-4.94114	0.273777	-18.05	0	-5.47773	-4.40454
Prob_C2
ASDAS/10	-113.22	55.94	-2.02	0.043	-222.86	-3.57947
Constant	7.80095	3.55186	2.2	0.028	0.839428	14.7625
Prob_C3
ASDAS/10	-8.52196	1.99516	-4.27	0	-12.4324	-4.61153
Constant	-0.177427	0.429042	-0.41	0.679	-1.01833	0.66348
/lns_1	-1.82229	0.0646482	-28.19	0	-1.949	-1.69559
/lns_2	1	(constrained)
/lns_3	-1.92647	0.184073	-10.47	0	-2.28725	-1.56569
/lns_4	-2.2982	0.0316966	-72.51	0	-2.36032	-2.23607
sigma1	0.161654	0.0104507			0.142416	0.183492
sigma2	2.71828	(constrained)
sigma3	0.145662	0.0268124			0.101546	0.208943
sigma4	0.10044	0.0031836			0.09439	0.106878

## Sheet: Appendix Table 2
ASDAS plus BASFI preferred model
4 component Adjusted Limited Dependent Variable Mixture Model
					95% Confidence Interval
	Coefficient	Robust se	z	P>|z|	Lower	Upper
Component 1
ASDAS/10	-0.102538	0.0501119	-2.05	0.041	-0.200756	-0.0043205
BASFI/10	-0.282547	0.0190233	-14.85	0	-0.319832	-0.245262
Age/10	-0.0064435	0.0035386	-1.82	0.069	-0.013379	0.0004921
Male	0.0140868	0.0093621	1.5	0.132	-0.0042626	0.0324362
Constant	0.816817	0.0187842	43.48	0	0.780001	0.853633
Component 2
ASDAS/10	-0.54148	0.170034	-3.18	0.001	-0.874742	-0.208219
BASFI/10	-1.33602	1.55875	-0.86	0.391	-4.39112	1.71908
Age/10	-0.0148987	0.0134342	-1.11	0.267	-0.0412292	0.0114318
Male	0.0005964	0.0352784	0.02	0.987	-0.068548	0.0697408
Constant	1.09322	0.0691558	15.81	0	0.957681	1.22877
Component 3
ASDAS/10	-0.16836	0.158799	-1.06	0.289	-0.4796	0.142881
BASFI/10	-0.267624	0.0822062	-3.26	0.001	-0.428745	-0.106502
Age/10	0.0129214	0.0087315	1.48	0.139	-0.004192	0.0300348
Male	0.103526	0.0280406	3.69	0	0.0485675	0.158485
Constant	0.847338	0.0589761	14.37	0	0.731747	0.962929
Component 4
ASDAS/10	-0.593283	0.129362	-4.59	0	-0.846827	-0.339738
BASFI/10	-0.268675	0.0512201	-5.25	0	-0.369065	-0.168285
Age/10	-0.0022999	0.0073048	-0.31	0.753	-0.0166171	0.0120173
Male	0.0065648	0.0197374	0.33	0.739	-0.0321199	0.0452494
Constant	0.418024	0.0526599	7.94	0	0.314813	0.521236
Prob_C1
ASDAS/10	-6.06492	1.03348	-5.87	0	-8.0905	-4.03933
BASFI/10	-2.48038	0.499439	-4.97	0	-3.45926	-1.5015
Constant	4.56201	0.327434	13.93	0	3.92025	5.20377
Prob_C2
ASDAS/10	-19.1371	7.95876	-2.4	0.016	-34.736	-3.5382
BASFI/10	-80.9832	20.7856	-3.9	0	-121.722	-40.2442
Constant	8.6664	1.43939	6.02	0	5.84525	11.4876
Prob_C3
ASDAS/10	-16.8747	3.40067	-4.96	0	-23.5399	-10.2095
BASFI/10	-2.06306	1.03628	-1.99	0.046	-4.09412	-0.031991
Constant	5.35587	0.53919	9.93	0	4.29907	6.41266
/lns_1	-2.48365	0.0466553	-53.23	0	-2.57509	-2.39221
/lns_2	-2.19524	0.121695	-18.04	0	-2.43376	-1.95673
/lns_3	-2.12317	0.107891	-19.68	0	-2.33464	-1.91171
/lns_4	-1.8542	0.0684514	-27.09	0	-1.98836	-1.72003
sigma1	0.0834383	0.0038928			0.0761469	0.0914279
sigma2	0.111331	0.0135485			0.0877064	0.14132
sigma3	0.119651	0.0129092			0.0968458	0.147827
sigma4	0.156579	0.0107181			0.13692	0.17906

## Sheet: Covariance 1
Variance covariance matrix
ASDAS preferred model
4 component Adjusted Limited Dependent Variable Mixture Model
		Comp_1	Comp_1	Comp_1	Comp_1	Comp_1	Comp_1	Comp_1	Comp_2	Comp_2	Comp_2	Comp_2	Comp_2	Comp_2	Comp_2	Comp_3	Comp_3	Comp_3	Comp_3	Comp_3	Comp_3	Comp_3	Comp_4	Comp_4	Comp_4	Comp_4	Comp_4	Comp_4	Comp_4	Prob_C1	Prob_C1	Prob_C2	Prob_C2	Prob_C3	Prob_C3	lns_1	lns_2	lns_3	lns_4
		ASDAS/10	(ASDAS/10)^2	age/10	(age/10)^2	Female	Male	Constant	ASDAS/10	(ASDAS/10)^2	age/10	(age/10)^2	Female	Male	Constant	ASDAS/10	(ASDAS/10)^2	age/10	(age/10)^2	Female	Male	Constant	ASDAS/10	(ASDAS/10)^2	age/10	(age/10)^2	Female	Male	Constant	ASDAS/10	Constant	ASDAS/10	Constant	ASDAS/10	Constant	_cons	_cons	_cons	_cons
Comp_1	ASDAS/10	0.367894	-0.618173	-0.00628161	0.000633301	0	-0.00201928	-0.0334477	0	0	0	0	0	0	0	-0.122607	0.338229	-0.0105732	0.00116846	0	0.00646364	0.0301091	0.00141615	-0.000682624	-0.000531705	6.60009e-05	0	-0.000461528	0.000871899	0.0375082	-0.0155968	-0.665518	0.0507989	-0.08502	0.0145919	0.00232164	0	-9.28073e-06	0.000443721
Comp_1	(ASDAS/10)^2	-0.618173	1.07314	0.0136689	-0.00136482	0	0.00333837	0.0448861	0	0	0	0	0	0	0	0.142534	-0.405499	0.0138577	-0.00151657	0	-0.00900795	-0.0381345	-0.000850767	0.000198943	0.00102417	-0.000128155	0	0.000838919	-0.00200268	-0.0237048	0.0140538	0.95931	-0.0729413	0.12144	-0.0216892	-0.00991589	0	-0.00184545	-5.17752e-05
Comp_1	age/10	-0.00628161	0.0136689	0.0020459	-0.00020831	0	9.43858e-05	-0.00414762	0	0	0	0	0	0	0	-0.0126665	0.0329381	-0.00031198	4.61797e-05	0	0.000411179	0.00123664	6.25138e-05	-5.67557e-05	0.000246024	-2.86938e-05	0	4.40499e-07	-0.00048855	0.0026465	-0.000588983	-0.0611704	0.00371619	-0.00425717	0.000478081	-0.000536436	0	-0.000318845	0.000113572
Comp_1	(age/10)^2	0.000633301	-0.00136482	-0.00020831	2.17659e-05	0	-5.65201e-06	0.000406891	0	0	0	0	0	0	0	0.00131974	-0.00344959	2.7688e-05	-4.48831e-06	0	-4.16716e-05	-0.000110717	-3.91225e-07	1.33434e-06	-2.89845e-05	3.40739e-06	0	6.118e-07	5.56052e-05	-0.00026116	5.23915e-05	0.00731249	-0.000438413	0.000453795	-5.33735e-05	5.50419e-05	0	3.70127e-05	-1.17944e-05
Comp_1	Female	0	0	0	0	0	0	0	0	0	0	0	0	0	0	0	0	0	0	0	0	0	0	0	0	0	0	0	0	0	0	0	0	0	0	0	0	0	0
Comp_1	Male	-0.00201928	0.00333837	9.43858e-05	-5.65201e-06	0	0.000493119	-0.000184814	0	0	0	0	0	0	0	0.0060071	-0.015994	0.000273979	-3.53837e-05	0	-0.000302042	-0.000807974	0.000306369	-0.000421648	-2.69538e-05	3.27239e-06	0	5.68221e-05	-1.51889e-05	-0.0057721	0.00190948	0.0349128	-0.00200179	0.00278774	-0.000590298	0.000354912	0	-2.03945e-06	-4.6277e-05
Comp_1	Constant	-0.0334477	0.0448861	-0.00414762	0.000406891	0	-0.000184814	0.0154872	0	0	0	0	0	0	0	0.052081	-0.137514	0.00249506	-0.000302691	0	-0.00199017	-0.00816327	-0.000595508	0.000309464	-0.000419204	4.7949e-05	0	2.81104e-05	0.000937848	-0.0147801	0.00477791	0.230095	-0.0158728	0.0233359	-0.00331339	0.00142979	0	0.000895399	-0.000401091
Comp_2	ASDAS/10	0	0	0	0	0	0	0	0	0	0	0	0	0	0	0	0	0	0	0	0	0	0	0	0	0	0	0	0	0	0	0	0	0	0	0	0	0	0
Comp_2	(ASDAS/10)^2	0	0	0	0	0	0	0	0	0	0	0	0	0	0	0	0	0	0	0	0	0	0	0	0	0	0	0	0	0	0	0	0	0	0	0	0	0	0
Comp_2	age/10	0	0	0	0	0	0	0	0	0	0	0	0	0	0	0	0	0	0	0	0	0	0	0	0	0	0	0	0	0	0	0	0	0	0	0	0	0	0
Comp_2	(age/10)^2	0	0	0	0	0	0	0	0	0	0	0	0	0	0	0	0	0	0	0	0	0	0	0	0	0	0	0	0	0	0	0	0	0	0	0	0	0	0
Comp_2	Female	0	0	0	0	0	0	0	0	0	0	0	0	0	0	0	0	0	0	0	0	0	0	0	0	0	0	0	0	0	0	0	0	0	0	0	0	0	0
Comp_2	Male	0	0	0	0	0	0	0	0	0	0	0	0	0	0	0	0	0	0	0	0	0	0	0	0	0	0	0	0	0	0	0	0	0	0	0	0	0	0
Comp_2	Constant	0	0	0	0	0	0	0	0	0	0	0	0	0	0	0	0	0	0	0	0	0	0	0	0	0	0	0	0	0	0	0	0	0	0	0	0	0	0
Comp_3	ASDAS/10	-0.122607	0.142534	-0.0126665	0.00131974	0	0.0060071	0.052081	0	0	0	0	0	0	0	14.5397	-36.7912	0.534394	-0.0663902	0	-0.481691	-2.02105	0.0257949	0.015788	-0.0182025	0.00196278	0	0.0164573	0.0168575	-0.149111	0.0732049	101.087	-6.0771	4.47127	-0.948979	0.0187969	0	0.204897	-0.0579683
Comp_3	(ASDAS/10)^2	0.338229	-0.405499	0.0329381	-0.00344959	0	-0.015994	-0.137514	0	0	0	0	0	0	0	-36.7912	93.7829	-1.33739	0.166995	0	1.2127	5.02469	-0.0688105	-0.0344669	0.0463309	-0.00500987	0	-0.0430288	-0.0414741	0.413098	-0.201687	-256.662	15.4368	-11.7526	2.48248	-0.0470596	0	-0.549738	0.150126
Comp_3	age/10	-0.0105732	0.0138577	-0.00031198	2.7688e-05	0	0.000273979	0.00249506	0	0	0	0	0	0	0	0.534394	-1.33739	0.156823	-0.0154568	0	-0.0151273	-0.427992	-0.00228666	0.00357727	-0.000151631	1.1104e-05	0	0.000230255	0.00043147	-0.00178799	0.00256923	1.91017	-0.112741	0.152675	-0.018839	0.000858778	0	0.01434	-0.00159413
Comp_3	(age/10)^2	0.00116846	-0.00151657	4.61797e-05	-4.48831e-06	0	-3.53837e-05	-0.000302691	0	0	0	0	0	0	0	-0.0663902	0.166995	-0.0154568	0.00155249	0	0.00198179	0.0422864	0.00016704	-0.000371108	4.85912e-05	-4.66144e-06	0	-5.22791e-05	-7.52814e-05	0.000428109	-0.000359821	-0.278428	0.0165073	-0.0190864	0.00285121	-0.000107479	0	-0.00188324	0.000236961
Comp_3	Female	0	0	0	0	0	0	0	0	0	0	0	0	0	0	0	0	0	0	0	0	0	0	0	0	0	0	0	0	0	0	0	0	0	0	0	0	0	0
Comp_3	Male	0.00646364	-0.00900795	0.000411179	-4.16716e-05	0	-0.000302042	-0.00199017	0	0	0	0	0	0	0	-0.481691	1.2127	-0.0151273	0.00198179	0	0.0248479	0.0609808	-0.000625435	-0.000511717	0.000575446	-6.09083e-05	0	-0.000403866	-0.000703452	0.00977979	-0.00431632	-3.15755	0.191019	-0.150767	0.0321752	-0.000592344	0	0.0061288	0.00162861
Comp_3	Constant	0.0301091	-0.0381345	0.00123664	-0.000110717	0	-0.000807974	-0.00816327	0	0	0	0	0	0	0	-2.02105	5.02469	-0.427992	0.0422864	0	0.0609808	1.2137	0.00560532	-0.00938886	0.000626535	-5.62713e-05	0	-0.000799358	-0.00125667	0.00696893	-0.00826172	-9.73076	0.580305	-0.586453	0.0854122	-0.00278289	0	-0.030879	0.00558076
Comp_4	ASDAS/10	0.00141615	-0.000850767	6.25138e-05	-3.91225e-07	0	0.000306369	-0.000595508	0	0	0	0	0	0	0	0.0257949	-0.0688105	-0.00228666	0.00016704	0	-0.000625435	0.00560532	0.0196895	-0.0350581	0.000128595	-1.75673e-05	0	0.000272622	-0.00265497	-0.0171613	0.00472756	1.24687	-0.0632189	0.00999221	-0.00132161	-0.00022471	0	0.000890444	-0.00118716
Comp_4	(ASDAS/10)^2	-0.000682624	0.000198943	-5.67557e-05	1.33434e-06	0	-0.000421648	0.000309464	0	0	0	0	0	0	0	0.015788	-0.0344669	0.00357727	-0.000371108	0	-0.000511717	-0.00938886	-0.0350581	0.0662425	-0.000545941	6.31857e-05	0	-0.000274203	0.00502713	0.0361013	-0.0101173	-1.67974	0.0820691	-0.00828566	-0.000752459	0.000114412	0	0.0014247	0.00188378
Comp_4	age/10	-0.000531705	0.00102417	0.000246024	-2.89845e-05	0	-2.69538e-05	-0.000419204	0	0	0	0	0	0	0	-0.0182025	0.0463309	-0.000151631	4.85912e-05	0	0.000575446	0.000626535	0.000128595	-0.000545941	0.000503606	-5.18733e-05	0	-4.43979e-05	-0.00109474	-0.00030261	0.000202792	-0.200152	0.0124957	-0.00640326	0.00168787	3.38424e-05	0	-0.000777552	3.9683e-05
Comp_4	(age/10)^2	6.60009e-05	-0.000128155	-2.86938e-05	3.40739e-06	0	3.27239e-06	4.7949e-05	0	0	0	0	0	0	0	0.00196278	-0.00500987	1.1104e-05	-4.66144e-06	0	-6.09083e-05	-5.62713e-05	-1.75673e-05	6.31857e-05	-5.18733e-05	5.45914e-06	0	4.42202e-06	0.000110823	2.31277e-05	-2.05594e-05	0.0209748	-0.00130649	0.000698555	-0.000181635	-3.45299e-06	0	8.23175e-05	-4.24611e-06
Comp_4	Female	0	0	0	0	0	0	0	0	0	0	0	0	0	0	0	0	0	0	0	0	0	0	0	0	0	0	0	0	0	0	0	0	0	0	0	0	0	0
Comp_4	Male	-0.000461528	0.000838919	4.40499e-07	6.118e-07	0	5.68221e-05	2.81104e-05	0	0	0	0	0	0	0	0.0164573	-0.0430288	0.000230255	-5.22791e-05	0	-0.000403866	-0.000799358	0.000272622	-0.000274203	-4.43979e-05	4.42202e-06	0	0.000104818	-8.49301e-06	-0.00102708	0.000396602	0.133654	-0.00797984	0.006838	-0.00145921	3.07449e-05	0	0.000770172	-0.000128836
Comp_4	Constant	0.000871899	-0.00200268	-0.00048855	5.56052e-05	0	-1.51889e-05	0.000937848	0	0	0	0	0	0	0	0.0168575	-0.0414741	0.00043147	-7.52814e-05	0	-0.000703452	-0.00125667	-0.00265497	0.00502713	-0.00109474	0.000110823	0	-8.49301e-06	0.00281287	0.00294975	-0.00111236	0.139374	-0.0111611	0.00670244	-0.002235	-5.44517e-05	0	0.000724265	0.000183973
Prob_C1	ASDAS/10	0.0375082	-0.0237048	0.0026465	-0.00026116	0	-0.0057721	-0.0147801	0	0	0	0	0	0	0	-0.149111	0.413098	-0.00178799	0.000428109	0	0.00977979	0.00696893	-0.0171613	0.0361013	-0.00030261	2.31277e-05	0	-0.00102708	0.00294975	0.716078	-0.220275	1.23267	-0.0807271	0.0241357	-0.0161958	-0.00935012	0	0.00268987	0.00299787
Prob_C1	Constant	-0.0155968	0.0140538	-0.000588983	5.23915e-05	0	0.00190948	0.00477791	0	0	0	0	0	0	0	0.0732049	-0.201687	0.00256923	-0.000359821	0	-0.00431632	-0.00826172	0.00472756	-0.0101173	0.000202792	-2.05594e-05	0	0.000396602	-0.00111236	-0.220275	0.0749539	-0.23557	0.0158321	0.0146271	0.00208183	0.00337065	0	-0.00119318	-0.00116226
Prob_C2	ASDAS/10	-0.665518	0.95931	-0.0611704	0.00731249	0	0.0349128	0.230095	0	0	0	0	0	0	0	101.087	-256.662	1.91017	-0.278428	0	-3.15755	-9.73076	1.24687	-1.67974	-0.200152	0.0209748	0	0.133654	0.139374	1.23267	-0.23557	3129.28	-197.367	64.4936	-15.214	0.098328	0	1.48265	-0.467342
Prob_C2	Constant	0.0507989	-0.0729413	0.00371619	-0.000438413	0	-0.00200179	-0.0158728	0	0	0	0	0	0	0	-6.0771	15.4368	-0.112741	0.0165073	0	0.191019	0.580305	-0.0632189	0.0820691	0.0124957	-0.00130649	0	-0.00797984	-0.0111611	-0.0807271	0.0158321	-197.367	12.6157	-3.98893	0.944165	-0.00621183	0	-0.0873525	0.027967
Prob_C3	ASDAS/10	-0.08502	0.12144	-0.00425717	0.000453795	0	0.00278774	0.0233359	0	0	0	0	0	0	0	4.47127	-11.7526	0.152675	-0.0190864	0	-0.150767	-0.586453	0.00999221	-0.00828566	-0.00640326	0.000698555	0	0.006838	0.00670244	0.0241357	0.0146271	64.4936	-3.98893	3.98065	-0.798305	0.0053287	0	0.0408108	-0.0174286
Prob_C3	Constant	0.0145919	-0.0216892	0.000478081	-5.33735e-05	0	-0.000590298	-0.00331339	0	0	0	0	0	0	0	-0.948979	2.48248	-0.018839	0.00285121	0	0.0321752	0.0854122	-0.00132161	-0.000752459	0.00168787	-0.000181635	0	-0.00145921	-0.002235	-0.0161958	0.00208183	-15.214	0.944165	-0.798305	0.184077	-0.00106015	0	-0.0143128	0.00321082
lns_1	_cons	0.00232164	-0.00991589	-0.000536436	5.50419e-05	0	0.000354912	0.00142979	0	0	0	0	0	0	0	0.0187969	-0.0470596	0.000858778	-0.000107479	0	-0.000592344	-0.00278289	-0.00022471	0.000114412	3.38424e-05	-3.45299e-06	0	3.07449e-05	-5.44517e-05	-0.00935012	0.00337065	0.098328	-0.00621183	0.0053287	-0.00106015	0.00417938	0	0.000609639	-0.000239369
lns_2	_cons	0	0	0	0	0	0	0	0	0	0	0	0	0	0	0	0	0	0	0	0	0	0	0	0	0	0	0	0	0	0	0	0	0	0	0	0	0	0
lns_3	_cons	-9.28073e-06	-0.00184545	-0.000318845	3.70127e-05	0	-2.03945e-06	0.000895399	0	0	0	0	0	0	0	0.204897	-0.549738	0.01434	-0.00188324	0	0.0061288	-0.030879	0.000890444	0.0014247	-0.000777552	8.23175e-05	0	0.000770172	0.000724265	0.00268987	-0.00119318	1.48265	-0.0873525	0.0408108	-0.0143128	0.000609639	0	0.0338829	-0.00195815
lns_4	_cons	0.000443721	-5.17752e-05	0.000113572	-1.17944e-05	0	-4.6277e-05	-0.000401091	0	0	0	0	0	0	0	-0.0579683	0.150126	-0.00159413	0.000236961	0	0.00162861	0.00558076	-0.00118716	0.00188378	3.9683e-05	-4.24611e-06	0	-0.000128836	0.000183973	0.00299787	-0.00116226	-0.467342	0.027967	-0.0174286	0.00321082	-0.000239369	0	-0.00195815	0.00100468

## Sheet: Covariance 2
Variance covariance matrix
ASDAS plus BASFI preferred model
4 component Adjusted Limited Dependent Variable Mixture Model
		Comp_1	Comp_1	Comp_1	Comp_1	Comp_1	Comp_1	Comp_2	Comp_2	Comp_2	Comp_2	Comp_2	Comp_2	Comp_3	Comp_3	Comp_3	Comp_3	Comp_3	Comp_3	Comp_4	Comp_4	Comp_4	Comp_4	Comp_4	Comp_4	Prob_C1	Prob_C1	Prob_C1	Prob_C2	Prob_C2	Prob_C2	Prob_C3	Prob_C3	Prob_C3	lns_1	lns_2	lns_3	lns_4
		ASDAS/10	BASFI/10	Age/10	Female	Male	Constant	ASDAS/10	BASFI/10	Age/10	Female	Male	Constant	ASDAS/10	BASFI/10	Age/10	Female	Male	Constant	ASDAS/10	BASFI/10	Age/10	Female	Male	Constant	ASDAS/10	BASFI/10	Constant	ASDAS/10	BASFI/10	Constant	ASDAS/10	BASFI/10	Constant	_cons	_cons	_cons	_cons
Comp_1	ASDAS/10	0.00251121	-0.000506944	-7.35837e-06	0	0.000121021	-0.000531862	-0.000531791	-0.0140949	7.98881e-05	0	-0.000222092	-0.000402954	0.000588245	0.000763152	6.09123e-05	0	-0.000378996	-0.000847244	0.000760791	-8.3105e-05	4.05551e-05	0	3.87298e-05	-0.000450628	0.00182577	0.000275612	-0.000688863	-0.0509594	0.053496	0.0188415	-0.0592448	0.00550178	0.0121093	0.000468241	-0.00072639	-0.00102803	-0.000316613
Comp_1	BASFI/10	-0.000506944	0.000361887	-1.71221e-05	0	-4.48032e-05	8.82232e-05	-0.000684015	-0.00836526	5.15978e-05	0	-4.84023e-05	-0.00030143	-0.000441409	0.000328888	-3.17288e-06	0	0.000105355	-0.000151893	-0.000290415	0.000188492	-3.08062e-05	0	-2.85747e-05	0.00014062	-0.000485691	0.00147909	-0.000583196	0.000162837	-0.0418306	0.00654009	0.014803	-0.00816034	0.000603655	5.63264e-05	-0.00070251	0.000235679	3.07628e-05
Comp_1	Age/10	-7.35837e-06	-1.71221e-05	1.25218e-05	0	5.09277e-06	-4.51685e-05	-2.84803e-05	0.000332869	-1.04895e-06	0	1.01012e-05	-2.14937e-06	0.000121527	-5.98127e-05	1.28079e-06	0	2.19007e-05	3.18485e-05	-4.78203e-05	-8.59779e-06	6.09242e-06	0	2.34084e-06	-5.29713e-06	-0.000343455	4.20581e-05	0.000169589	0.00309459	-0.0140928	-0.000368531	-0.00273031	0.000540435	-0.000142332	4.19862e-05	3.37447e-06	-1.76764e-06	2.89888e-05
Comp_1	Female	0	0	0	0	0	0	0	0	0	0	0	0	0	0	0	0	0	0	0	0	0	0	0	0	0	0	0	0	0	0	0	0	0	0	0	0	0
Comp_1	Male	0.000121021	-4.48032e-05	5.09277e-06	0	8.76489e-05	-6.92701e-05	-1.58563e-07	0.00036044	-8.57774e-07	0	1.76724e-05	-6.29048e-06	0.000586143	-0.000200425	-9.67147e-06	0	2.35421e-05	0.000112168	5.25251e-05	-4.18074e-05	1.20799e-06	0	2.29833e-05	-4.44247e-06	-0.000209619	-0.000323176	0.000391261	0.00460497	-0.00839597	-0.000853463	-0.010537	0.00280686	1.32721e-05	7.7463e-05	2.60135e-05	-0.000101837	3.07588e-05
Comp_1	Constant	-0.000531862	8.82232e-05	-4.51685e-05	0	-6.92701e-05	0.000352846	0.000588554	0.00667643	-4.39847e-05	0	4.25349e-05	0.000273692	-0.000650194	-6.40685e-05	-2.20318e-05	0	-1.97186e-05	0.000205836	3.47079e-05	3.00686e-06	-2.57037e-05	0	-1.51786e-05	0.000115324	0.000541469	-0.00070877	-0.000110615	0.00346514	0.0584359	-0.00723696	0.0203829	-0.000511256	-0.00297514	-0.000297566	0.000510833	0.000220118	-4.29595e-05
Comp_2	ASDAS/10	-0.000531791	-0.000684015	-2.84803e-05	0	-1.58563e-07	0.000588554	0.0289117	0.085456	-0.000192594	0	-0.000357141	0.000177109	-0.000976762	-0.000450054	-0.000167265	0	0.000177045	0.00116254	-0.00077715	-8.29577e-05	2.54059e-05	0	1.26407e-05	0.000251174	0.0104544	-0.0127382	0.00288714	-0.2589	0.718854	-0.0419914	0.0888463	0.0195511	-0.0221363	-0.00269532	0.0112604	-0.00183972	0.000563317
Comp_2	BASFI/10	-0.0140949	-0.00836526	0.000332869	0	0.00036044	0.00667643	0.085456	2.42971	-0.0112779	0	0.0256635	0.0369767	0.0018215	-0.0319377	0.000471846	0	-0.00816633	0.0207711	-0.00772076	-0.00530974	0.000455411	0	-6.07531e-05	0.00500776	0.00559874	-0.108407	0.0544423	4.65659	2.23172	-1.44057	0.0216379	0.64395	-0.297711	-0.0214067	0.108973	-0.00991097	0.00776439
Comp_2	Age/10	7.98881e-05	5.15978e-05	-1.04895e-06	0	-8.57774e-07	-4.39847e-05	-0.000192594	-0.0112779	0.000180477	0	-0.000118561	-0.000770715	-2.52793e-05	0.000172376	-1.72509e-06	0	4.75053e-05	-0.000108493	5.95929e-05	3.16468e-05	-2.28487e-06	0	-2.60955e-06	-3.49786e-05	-0.000166057	0.000661136	-0.000297607	-0.0426853	0.00866098	0.0106493	-3.29409e-05	-0.00308376	0.00135793	0.000120549	-0.000488336	8.78413e-05	-4.98739e-05
Comp_2	Female	0	0	0	0	0	0	0	0	0	0	0	0	0	0	0	0	0	0	0	0	0	0	0	0	0	0	0	0	0	0	0	0	0	0	0	0	0
Comp_2	Male	-0.000222092	-4.84023e-05	1.01012e-05	0	1.76724e-05	4.25349e-05	-0.000357141	0.0256635	-0.000118561	0	0.00124457	-0.000261647	0.000525896	-0.000653736	3.71463e-06	0	-0.000161124	0.000403962	-3.96697e-05	-6.59921e-05	3.63255e-06	0	-4.87179e-06	4.83887e-05	-0.0015288	-0.000901095	0.00118031	0.162201	-0.290696	-0.0233823	-0.0157405	0.0083725	-0.00164133	-1.95219e-05	0.000261844	3.42946e-05	5.56175e-05
Comp_2	Constant	-0.000402954	-0.00030143	-2.14937e-06	0	-6.29048e-06	0.000273692	0.000177109	0.0369767	-0.000770715	0	-0.000261647	0.00478253	-0.00029491	-0.000645076	2.44211e-06	0	-0.000136577	0.000433994	-0.000340392	-0.000159533	9.69242e-06	0	2.57628e-05	0.000196739	0.00157772	-0.00379208	0.00128305	0.0518867	0.381344	-0.0452359	0.0172648	0.0123426	-0.00800327	-0.000775103	0.00425605	-0.000501601	0.000276548
Comp_3	ASDAS/10	0.000588245	-0.000441409	0.000121527	0	0.000586143	-0.000650194	-0.000976762	0.0018215	-2.52793e-05	0	0.000525896	-0.00029491	0.0252172	-0.00716185	-0.000173562	0	0.000277212	0.00126722	-0.00180081	0.000187277	-7.33844e-05	0	-0.000160042	0.000884466	-0.0152666	-0.00459544	0.0114558	0.0872847	-0.453368	-0.00914705	-0.218958	0.0411713	0.00303572	0.00194526	-0.000556472	-0.00360772	0.000713813
Comp_3	BASFI/10	0.000763152	0.000328888	-5.98127e-05	0	-0.000200425	-6.40685e-05	-0.000450054	-0.0319377	0.000172376	0	-0.000653736	-0.000645076	-0.00716185	0.00675786	-6.06414e-05	0	0.000324063	-0.00187273	-0.000187199	0.00053253	-4.70241e-05	0	-7.89696e-05	-3.54441e-05	0.000118148	0.00518453	-0.00355895	-0.127153	0.384128	0.0363146	0.0397957	-0.0361863	0.0128001	0.000359954	-0.00130446	-0.00274323	-0.000299525
Comp_3	Age/10	6.09123e-05	-3.17288e-06	1.28079e-06	0	-9.67147e-06	-2.20318e-05	-0.000167265	0.000471846	-1.72509e-06	0	3.71463e-06	2.44211e-06	-0.000173562	-6.06414e-05	7.62392e-05	0	-8.39519e-05	-0.000383803	1.82434e-05	-1.28074e-05	6.48759e-06	0	7.40016e-07	-2.81863e-05	0.000995418	-2.84327e-05	-0.000391231	0.00070184	-0.00621391	0.00087246	0.00176615	-0.000683816	0.000638228	-2.8938e-05	-2.59444e-05	0.00011755	1.10486e-05
Comp_3	Female	0	0	0	0	0	0	0	0	0	0	0	0	0	0	0	0	0	0	0	0	0	0	0	0	0	0	0	0	0	0	0	0	0	0	0	0	0
Comp_3	Male	-0.000378996	0.000105355	2.19007e-05	0	2.35421e-05	-1.97186e-05	0.000177045	-0.00816633	4.75053e-05	0	-0.000161124	-0.000136577	0.000277212	0.000324063	-8.39519e-05	0	0.000786276	0.000171962	-0.000178586	9.13105e-07	-7.71312e-06	0	1.31025e-05	9.1612e-05	-0.00379443	0.000403443	0.00131654	-0.0307901	0.0380472	0.00512364	0.00787985	-0.00687983	-0.00139675	0.000206789	-0.000215429	0.000346961	-1.8542e-05
Comp_3	Constant	-0.000847244	-0.000151893	3.18485e-05	0	0.000112168	0.000205836	0.00116254	0.0207711	-0.000108493	0	0.000403962	0.000433994	0.00126722	-0.00187273	-0.000383803	0	0.000171962	0.00347818	-0.000108121	-0.000170405	-1.08353e-05	0	2.76909e-05	0.000207737	-0.00722935	-0.00164352	0.00431275	0.0992594	-0.179169	-0.0304481	-0.0406031	0.0231319	-0.00983337	0.000106044	0.00110901	0.000300315	0.000189872
Comp_4	ASDAS/10	0.000760791	-0.000290415	-4.78203e-05	0	5.25251e-05	3.47079e-05	-0.00077715	-0.00772076	5.95929e-05	0	-3.96697e-05	-0.000340392	-0.00180081	-0.000187199	1.82434e-05	0	-0.000178586	-0.000108121	0.0167345	-0.00364152	0.000241003	0	0.000861989	-0.0049073	-0.0112869	0.00202052	-0.00032023	-0.0136866	-0.128053	0.00985188	-0.0185499	0.0128274	0.00239323	0.000397191	-0.000463897	0.000749564	-0.00304985
Comp_4	BASFI/10	-8.3105e-05	0.000188492	-8.59779e-06	0	-4.18074e-05	3.00686e-06	-8.29577e-05	-0.00530974	3.16468e-05	0	-6.59921e-05	-0.000159533	0.000187277	0.00053253	-1.28074e-05	0	9.13105e-07	-0.000170405	-0.00364152	0.0026235	-0.00012	0	-0.000331804	0.000471823	-0.000558552	-0.00441966	0.00348334	-0.0165788	0.0760024	0.00815787	-0.00352391	-0.00935253	0.00554666	0.000175281	-0.000317929	-0.000161191	-0.000306399
Comp_4	Age/10	4.05551e-05	-3.08062e-05	6.09242e-06	0	1.20799e-06	-2.57037e-05	2.54059e-05	0.000455411	-2.28487e-06	0	3.63255e-06	9.69242e-06	-7.33844e-05	-4.70241e-05	6.48759e-06	0	-7.71312e-06	-1.08353e-05	0.000241003	-0.00012	5.33606e-05	0	4.18282e-05	-0.000269119	0.000971183	-0.000171348	-0.000325637	-0.000155225	-0.0103862	-0.000273087	0.00114819	0.000691032	-0.000446452	-1.43548e-05	3.33025e-05	6.21932e-05	4.78523e-05
Comp_4	Female	0	0	0	0	0	0	0	0	0	0	0	0	0	0	0	0	0	0	0	0	0	0	0	0	0	0	0	0	0	0	0	0	0	0	0	0	0
Comp_4	Male	3.87298e-05	-2.85747e-05	2.34084e-06	0	2.29833e-05	-1.51786e-05	1.26407e-05	-6.07531e-05	-2.60955e-06	0	-4.87179e-06	2.57628e-05	-0.000160042	-7.89696e-05	7.40016e-07	0	1.31025e-05	2.76909e-05	0.000861989	-0.000331804	4.18282e-05	0	0.000389567	-0.000436592	0.00148134	0.000195237	-0.000729424	0.00147084	0.00482286	-0.00119134	0.00309781	0.000777966	-0.000991178	5.3537e-06	5.18769e-05	4.67863e-05	0.000146291
Comp_4	Constant	-0.000450628	0.00014062	-5.29713e-06	0	-4.44247e-06	0.000115324	0.000251174	0.00500776	-3.49786e-05	0	4.83887e-05	0.000196739	0.000884466	-3.54441e-05	-2.81863e-05	0	9.1612e-05	0.000207737	-0.0049073	0.000471823	-0.000269119	0	-0.000436592	0.00277306	-0.000920075	0.00276953	-0.000259241	0.0176949	0.0447663	-0.00792729	0.00331996	-0.00149296	-0.00237839	-0.000190252	0.000261007	-0.000501554	0.000915833
Prob_C1	ASDAS/10	0.00182577	-0.000485691	-0.000343455	0	-0.000209619	0.000541469	0.0104544	0.00559874	-0.000166057	0	-0.0015288	0.00157772	-0.0152666	0.000118148	0.000995418	0	-0.00379443	-0.00722935	-0.0112869	-0.000558552	0.000971183	0	0.00148134	-0.000920075	1.06808	-0.262755	-0.189896	0.479424	0.528456	-0.122083	1.28497	-0.175092	-0.160234	-0.00677977	0.00264851	-0.00179051	0.00734737
Prob_C1	BASFI/10	0.000275612	0.00147909	4.20581e-05	0	-0.000323176	-0.00070877	-0.0127382	-0.108407	0.000661136	0	-0.000901095	-0.00379208	-0.00459544	0.00518453	-2.84327e-05	0	0.000403443	-0.00164352	0.00202052	-0.00441966	-0.000171348	0	0.000195237	0.00276953	-0.262755	0.249439	-0.0622234	-0.112342	-1.67385	0.0414666	-0.154424	0.116258	-0.0326023	-0.000437359	-0.00994165	-0.00173243	-0.000355704
Prob_C1	Constant	-0.000688863	-0.000583196	0.000169589	0	0.000391261	-0.000110615	0.00288714	0.0544423	-0.000297607	0	0.00118031	0.00128305	0.0114558	-0.00355895	-0.000391231	0	0.00131654	0.00431275	-0.00032023	0.00348334	-0.000325637	0	-0.000729424	-0.000259241	-0.189896	-0.0622234	0.107213	0.000368344	0.629714	0.0178313	-0.433962	-0.00851432	0.0826581	0.00409277	0.00388622	0.000311253	-0.00162036
Prob_C2	ASDAS/10	-0.0509594	0.000162837	0.00309459	0	0.00460497	0.00346514	-0.2589	4.65659	-0.0426853	0	0.162201	0.0518867	0.0872847	-0.127153	0.00070184	0	-0.0307901	0.0992594	-0.0136866	-0.0165788	-0.000155225	0	0.00147084	0.0176949	0.479424	-0.112342	0.000368344	63.3418	-41.7107	-8.34271	-5.94049	2.22254	-0.28954	0.0512372	-0.13276	-0.0148746	0.0132708
Prob_C2	BASFI/10	0.053496	-0.0418306	-0.0140928	0	-0.00839597	0.0584359	0.718854	2.23172	0.00866098	0	-0.290696	0.381344	-0.453368	0.384128	-0.00621391	0	0.0380472	-0.179169	-0.128053	0.0760024	-0.0103862	0	0.00482286	0.0447663	0.528456	-1.67385	0.629714	-41.7107	432.041	-4.88371	14.0696	-2.01754	-0.454266	-0.174516	0.850258	-0.23467	-0.027068
Prob_C2	Constant	0.0188415	0.00654009	-0.000368531	0	-0.000853463	-0.00723696	-0.0419914	-1.44057	0.0106493	0	-0.0233823	-0.0452359	-0.00914705	0.0363146	0.00087246	0	0.00512364	-0.0304481	0.00985188	0.00815787	-0.000273087	0	-0.00119134	-0.00792729	-0.122083	0.0414666	0.0178313	-8.34271	-4.88371	2.07184	0.141493	-0.655071	0.33156	0.0151961	-0.0729332	0.0118057	-0.00891421
Prob_C3	ASDAS/10	-0.0592448	0.014803	-0.00273031	0	-0.010537	0.0203829	0.0888463	0.0216379	-3.29409e-05	0	-0.0157405	0.0172648	-0.218958	0.0397957	0.00176615	0	0.00787985	-0.0406031	-0.0185499	-0.00352391	0.00114819	0	0.00309781	0.00331996	1.28497	-0.154424	-0.433962	-5.94049	14.0696	0.141493	11.5645	-1.87406	-1.04047	-0.0881381	0.0403614	0.0912793	0.0113481
Prob_C3	BASFI/10	0.00550178	-0.00816034	0.000540435	0	0.00280686	-0.000511256	0.0195511	0.64395	-0.00308376	0	0.0083725	0.0123426	0.0411713	-0.0361863	-0.000683816	0	-0.00687983	0.0231319	0.0128274	-0.00935253	0.000691032	0	0.000777966	-0.00149296	-0.175092	0.116258	-0.00851432	2.22254	-2.01754	-0.655071	-1.87406	1.07387	-0.133382	-0.000892975	0.0328633	-0.0166622	-4.46852e-05
Prob_C3	Constant	0.0121093	0.000603655	-0.000142332	0	1.32721e-05	-0.00297514	-0.0221363	-0.297711	0.00135793	0	-0.00164133	-0.00800327	0.00303572	0.0128001	0.000638228	0	-0.00139675	-0.00983337	0.00239323	0.00554666	-0.000446452	0	-0.000991178	-0.00237839	-0.160234	-0.0326023	0.0826581	-0.28954	-0.454266	0.33156	-1.04047	-0.133382	0.290726	0.0110092	-0.0207267	-0.00503967	-0.00452406
lns_1	_cons	0.000468241	5.63264e-05	4.19862e-05	0	7.7463e-05	-0.000297566	-0.00269532	-0.0214067	0.000120549	0	-1.95219e-05	-0.000775103	0.00194526	0.000359954	-2.8938e-05	0	0.000206789	0.000106044	0.000397191	0.000175281	-1.43548e-05	0	5.3537e-06	-0.000190252	-0.00677977	-0.000437359	0.00409277	0.0512372	-0.174516	0.0151961	-0.0881381	-0.000892975	0.0110092	0.00217672	-0.00190096	-0.000477973	-0.000438573
lns_2	_cons	-0.00072639	-0.00070251	3.37447e-06	0	2.60135e-05	0.000510833	0.0112604	0.108973	-0.000488336	0	0.000261844	0.00425605	-0.000556472	-0.00130446	-2.59444e-05	0	-0.000215429	0.00110901	-0.000463897	-0.000317929	3.33025e-05	0	5.18769e-05	0.000261007	0.00264851	-0.00994165	0.00388622	-0.13276	0.850258	-0.0729332	0.0403614	0.0328633	-0.0207267	-0.00190096	0.0148097	-0.00156336	0.00056996
lns_3	_cons	-0.00102803	0.000235679	-1.76764e-06	0	-0.000101837	0.000220118	-0.00183972	-0.00991097	8.78413e-05	0	3.42946e-05	-0.000501601	-0.00360772	-0.00274323	0.00011755	0	0.000346961	0.000300315	0.000749564	-0.000161191	6.21932e-05	0	4.67863e-05	-0.000501554	-0.00179051	-0.00173243	0.000311253	-0.0148746	-0.23467	0.0118057	0.0912793	-0.0166622	-0.00503967	-0.000477973	-0.00156336	0.0116403	-0.00041209
lns_4	_cons	-0.000316613	3.07628e-05	2.89888e-05	0	3.07588e-05	-4.29595e-05	0.000563317	0.00776439	-4.98739e-05	0	5.56175e-05	0.000276548	0.000713813	-0.000299525	1.10486e-05	0	-1.8542e-05	0.000189872	-0.00304985	-0.000306399	4.78523e-05	0	0.000146291	0.000915833	0.00734737	-0.000355704	-0.00162036	0.0132708	-0.027068	-0.00891421	0.0113481	-4.46852e-05	-0.00452406	-0.000438573	0.00056996	-0.00041209	0.0046856
