# Supplementary material
Source: HighWire-hosted journal article supplement (https://rmdopen.bmj.com/content/8/1/e001955)
Supplement: inline-supplementary-material-2 [file inline-supplementary-material-2.xlsm]

## Sheet: ASDAS model
EQ-5D-3L (UK tariff) calculator from ASDAS scores
This calculator is based on results reported in Hernandez Alava, M., Wailoo A, et al. (in submission) "MEASURING QUALITY OF LIFE OF PATIENTS WITH AXIAL SPONDYLOARTHRITIS FOR ECONOMIC EVALUATION", Rheumatology
Please cite our paper if you use the calculator!
INPUTS
	User inputs			Used in model
ASDAS	0		ASDAS/10	0
Age	23		Age/10	2.3
Sex (1=male, 0=female)	1		Sex	1
OUTPUTS
Outputs	Component Expected EQ-5D			Component probabilities			Overall expected EQ-5D
1	0.584035			2.92316e-06
2	1			0.999246			0.99999
3	1			0.000342536
4	0.96842			0.000409036			0.999986
Details of internal validation done for this file
Checked against Stata output: using G:\My Drive\NASS\MHAorganise\stata\results\aldvmm\all models\predictions\predictions.do
Run STATA code to produce predictions for specified inputs
	ASDAS	Age	Sex				STATA	EXCEL
	6	60	1				-0.00421984	-0.00421977
	1	45	1				0.858237	0.858236
	4	25	0				0.438059	0.438059
	2	20	0				0.7804	0.780399
	2	30	0				0.738415	0.738415
	3	80	1				0.561899	0.561898
	5	20	0				0.249723	0.249723
	5	80	0				0.157932	0.157931
	0	30	1				0.999986	0.999986
	0	23	1				0.99999	0.99999

## Sheet: ASDAS BASFI model
EQ-5D-3L (UK tariff) calculator from ASDAS and BASFI scores
This calculator is based on results reported in Hernandez Alava, M., Wailoo A, et al. (in submission) "MEASURING QUALITY OF LIFE OF PATIENTS WITH AXIAL SPONDYLOARTHRITIS FOR ECONOMIC EVALUATION", Rheumatology
Please cite our paper if you use the calculator!
INPUTS
	User inputs			Used in model
ASDAS	1		ASDAS/10	0.1
BASFI	5		BASFI/10	0.5
Age	60		Age/10	6
Sex (1=male, 0=female)	1		Sex	1
OUTPUTS
Outputs	Component Expected EQ-5D			Component probabilities			Overall expected EQ-5D
1	0.640887			0.502329
2	0.282272			7.39786e-17			0.742048
3	0.889042			0.464425
4	0.217125			0.0332458			0.742048
Details of internal validation done for this file
Checked against Stata output: using G:\My Drive\NASS\MHAorganise\stata ASDASBASFI\results\aldvmm\all models\predictions\predictions.do
Run STATA code to load dataset with predictions.
	ASDAS	BASFI	Age	Sex			STATA	EXCEL
	1	5	60	1			0.742048	0.742048
	1	2	60	0			0.773956	0.773956
	3	2	60	1			0.677209	0.677209
	3	4.2	30	0			0.579748	0.579748
	5	9	30	1			0.0896279	0.0896278
	5	1	30	0			0.584227	0.584227
